# Supplementary material for: New Insights into the Biological Functions of Essential TsaB/YeaZ Protein in Staphylococcus aureus
Source: MDPI journal article supplement (doi:10.3390/antibiotics13050393), 2024-04-25
Supplement: s1 [file s1]

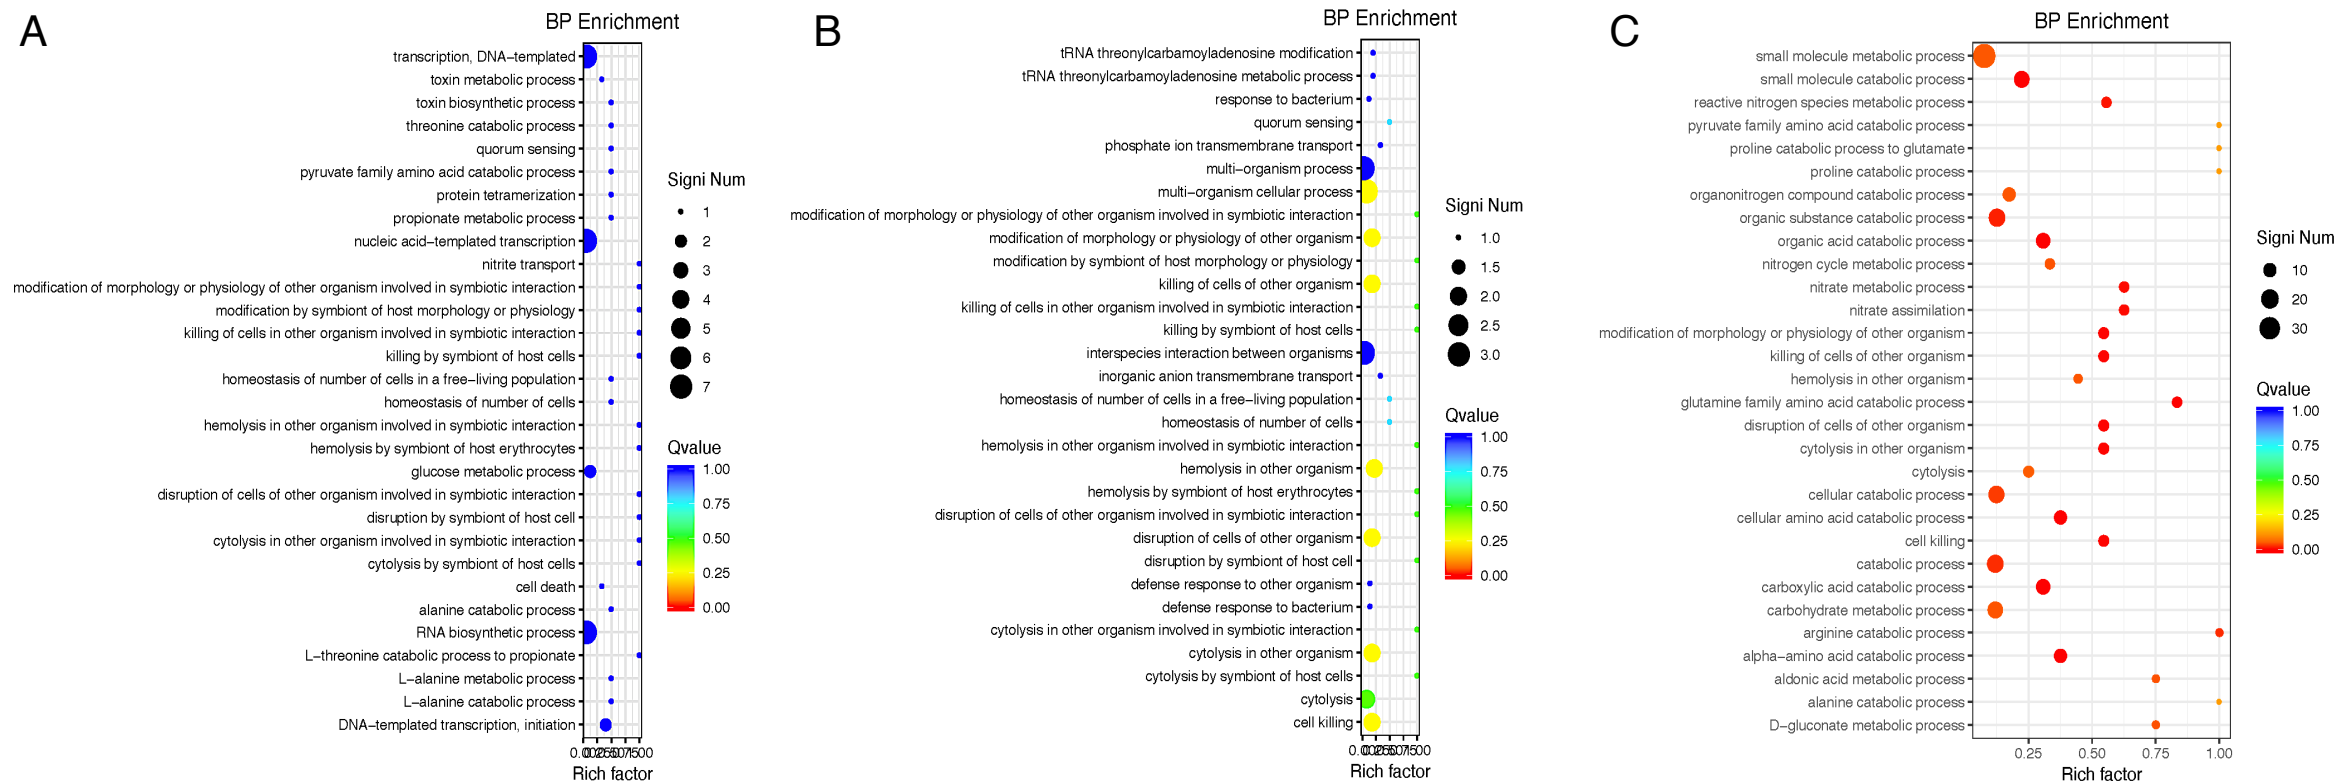

Figure S1. Downregulated enriched BP biological pathways A at OD 0.2, B at OD 0.5, and C at OD 1.0 after down-regulating Tsab/YeaZ.

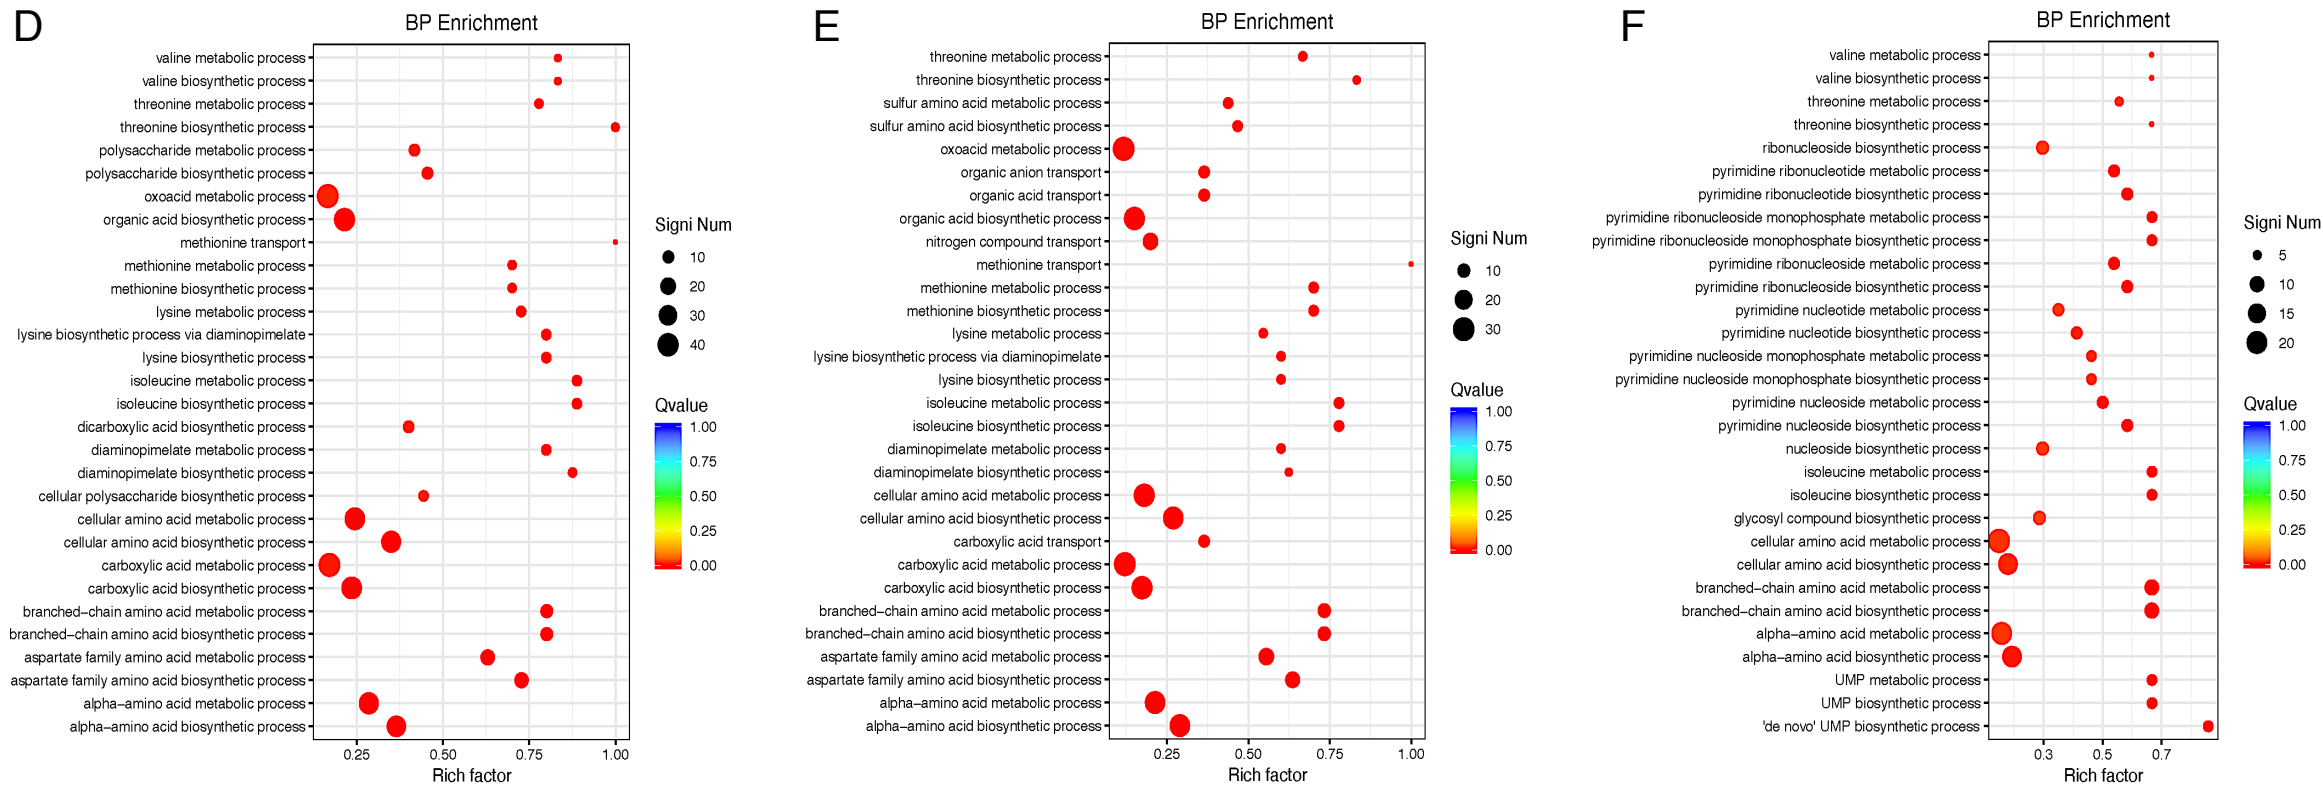

Figure S1. Upregulated enriched BP biological pathways D at OD 0.2, E at OD 0.5, and F at OD 1.0 after down-regulating *TsaB/YeaZ*.
